# Supplementary material
Source: PubMed Central journal article supplement (PMC5108575)
Supplement: NIHMS808620-supplement-1.pdf [file NIHMS808620-supplement-1.pdf]

# Supp Figure 1

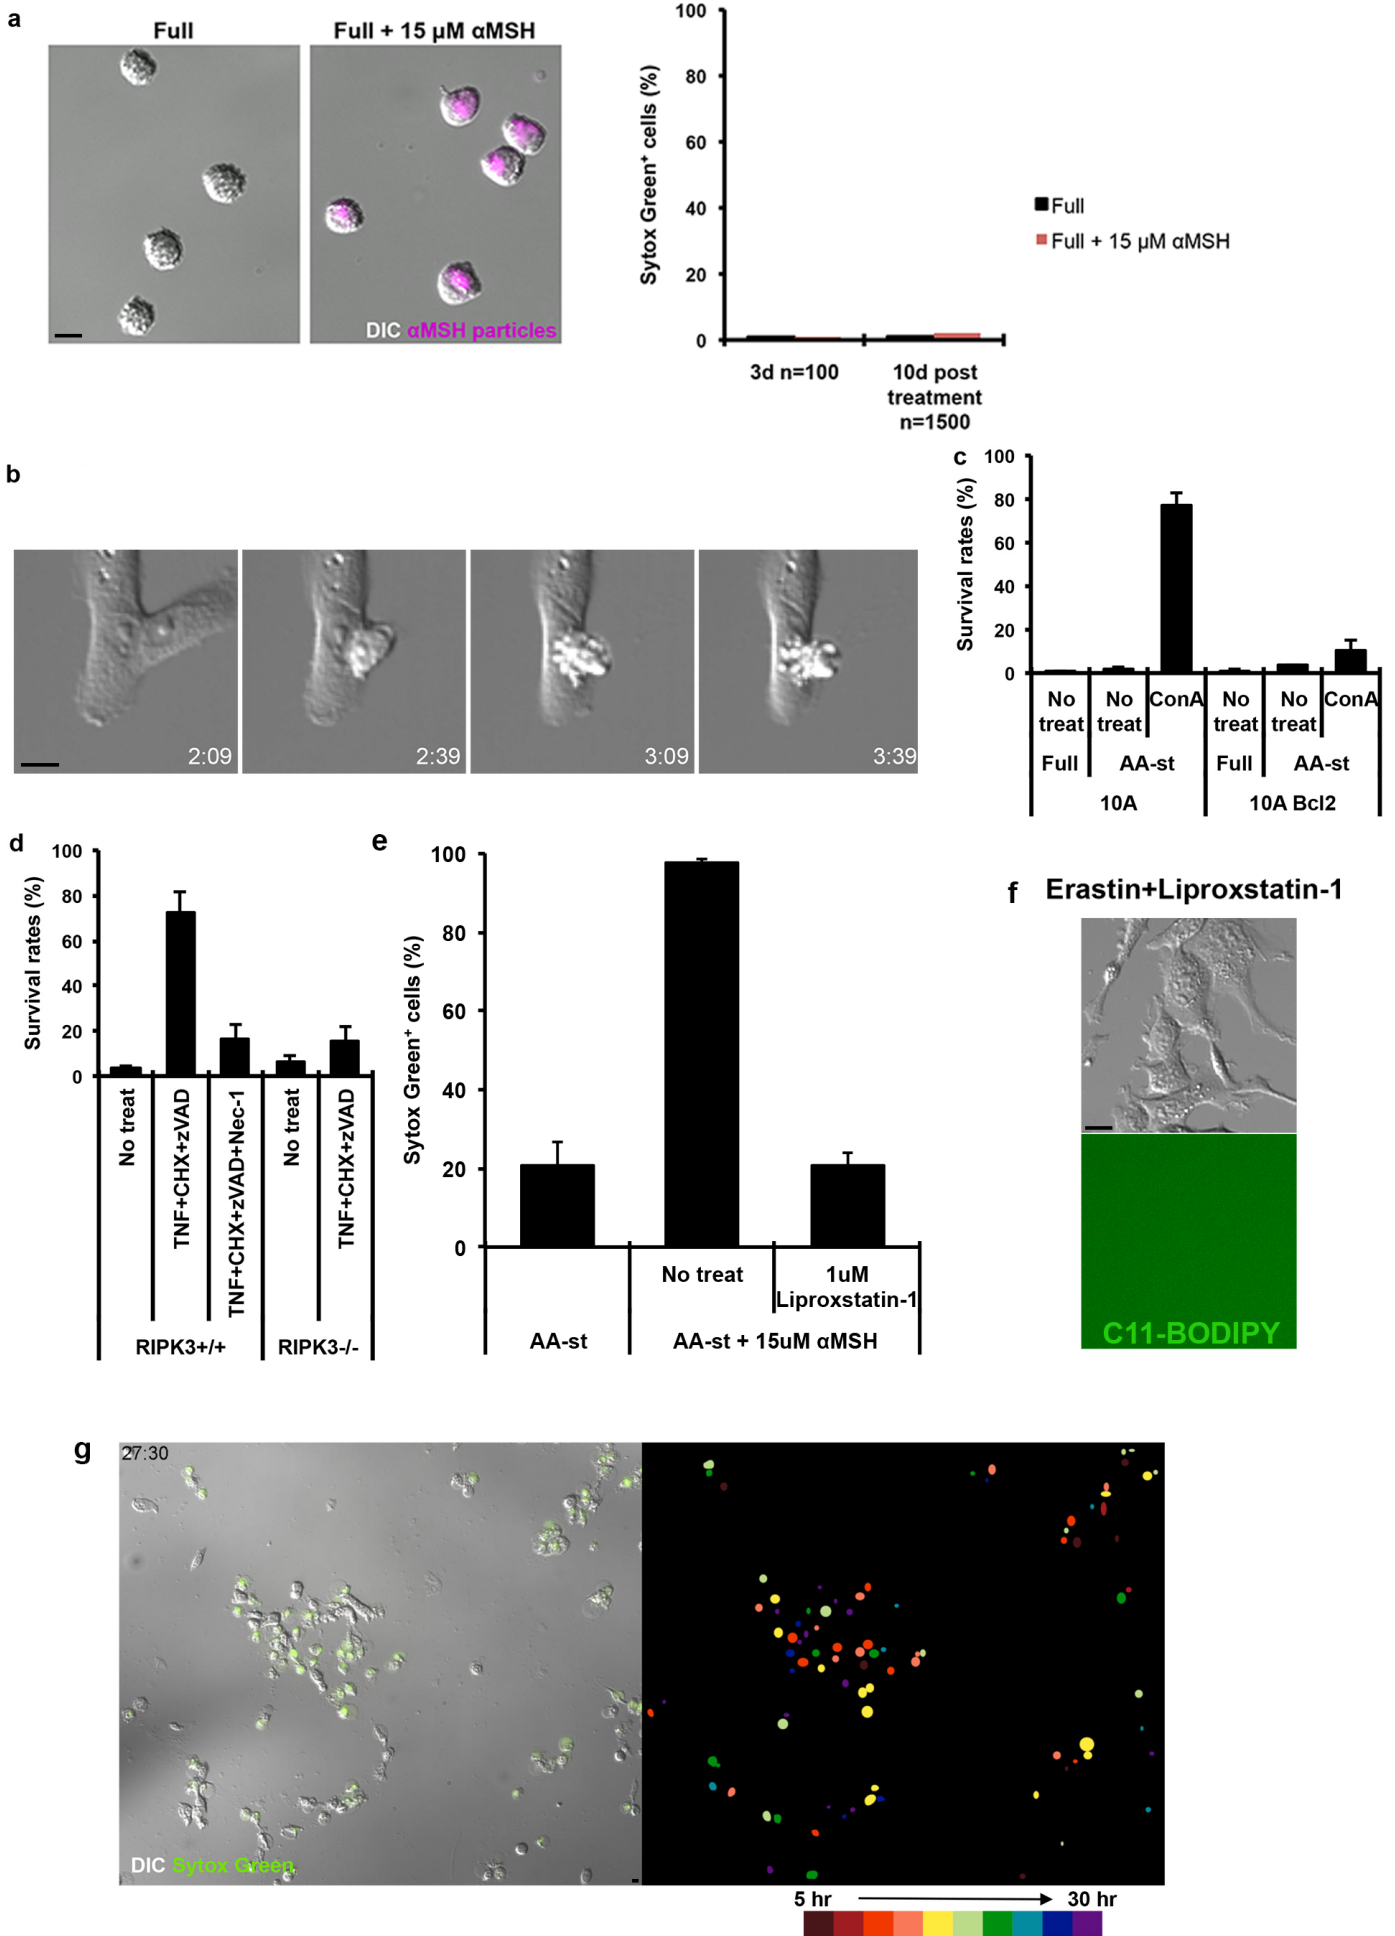

# Supp Figure 2

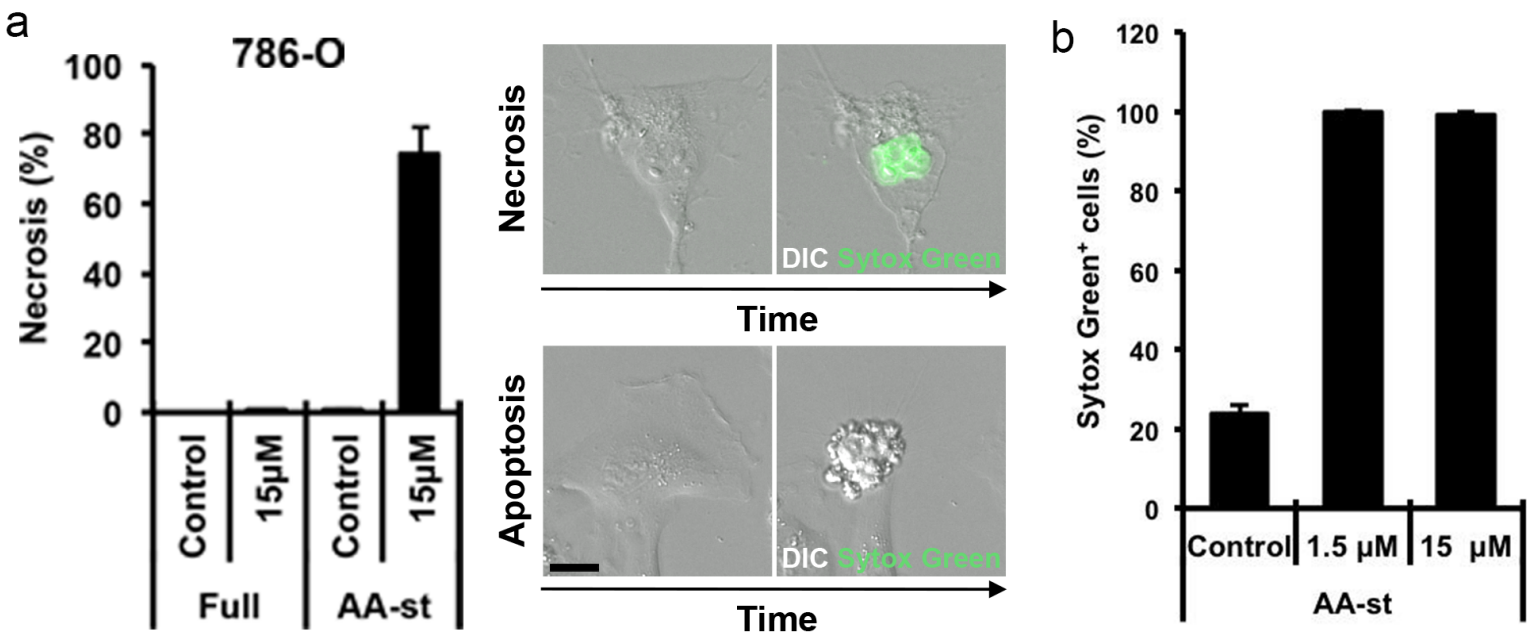

### Supp. Figure 3

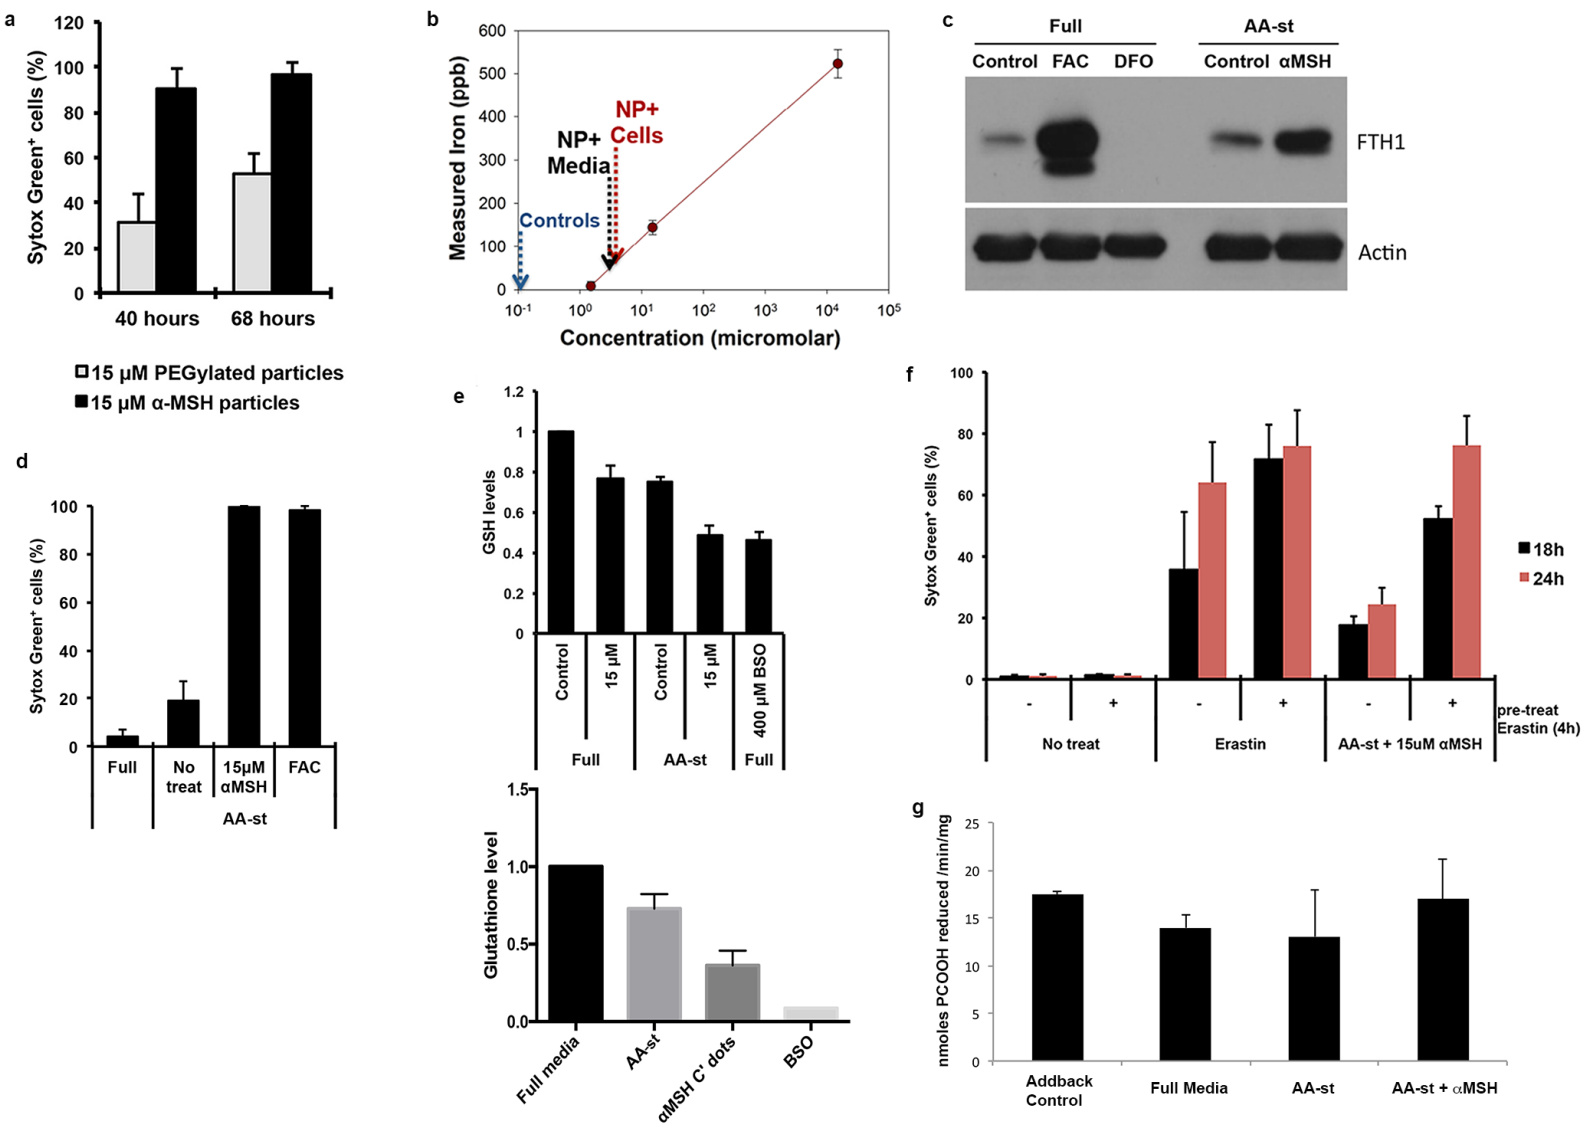

Supp Figure 4

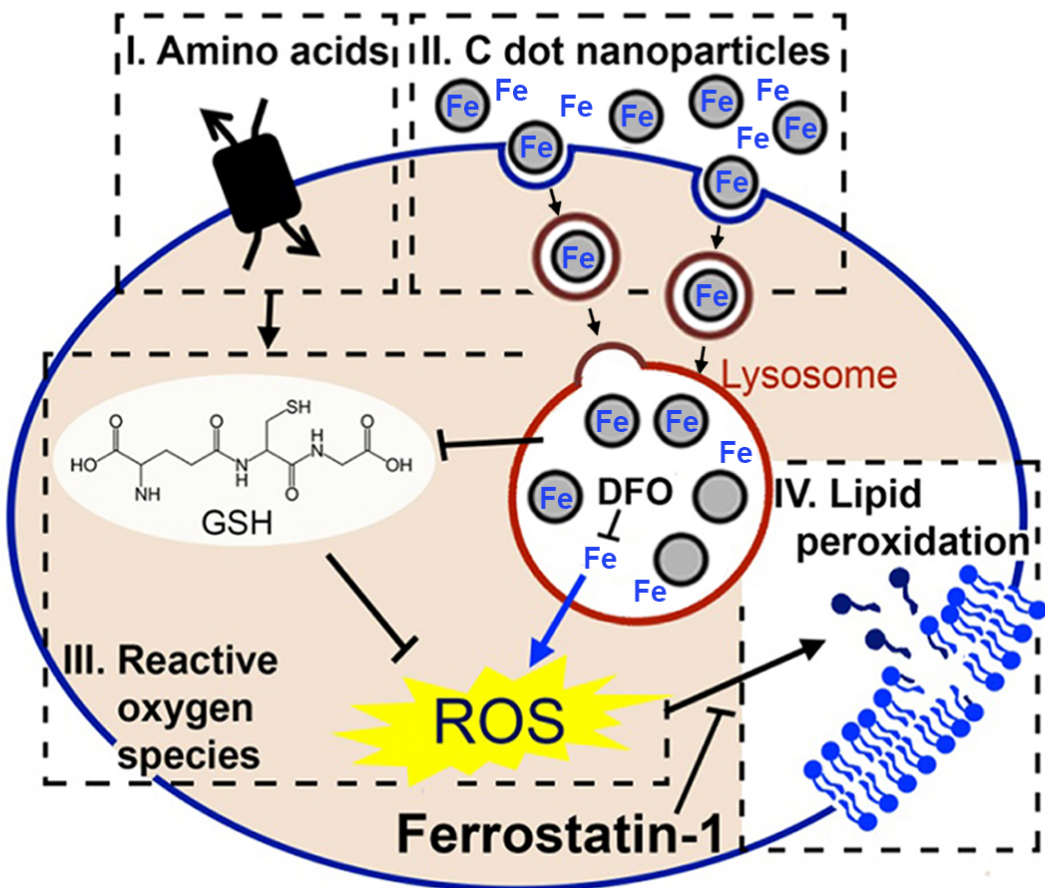

Supp. Fig. 5

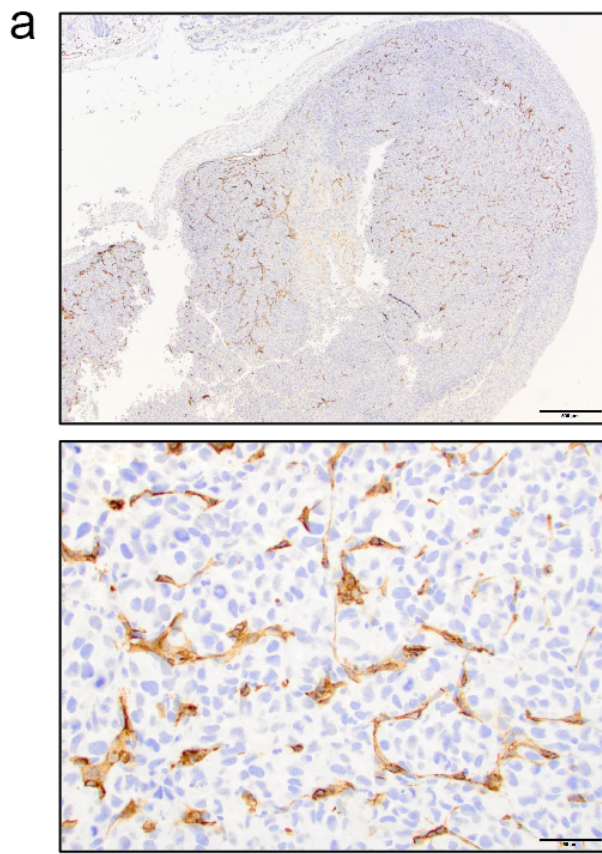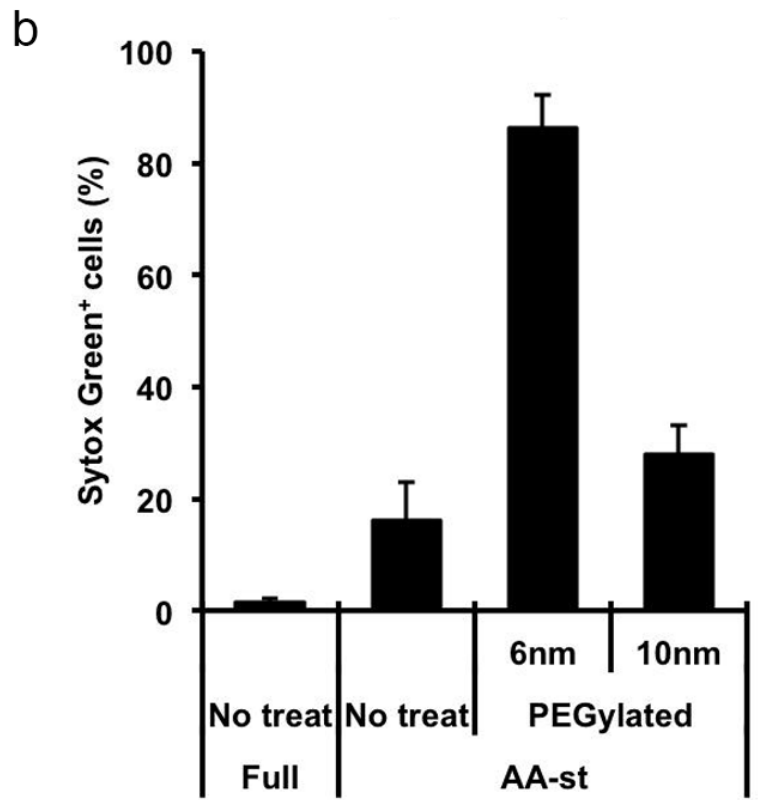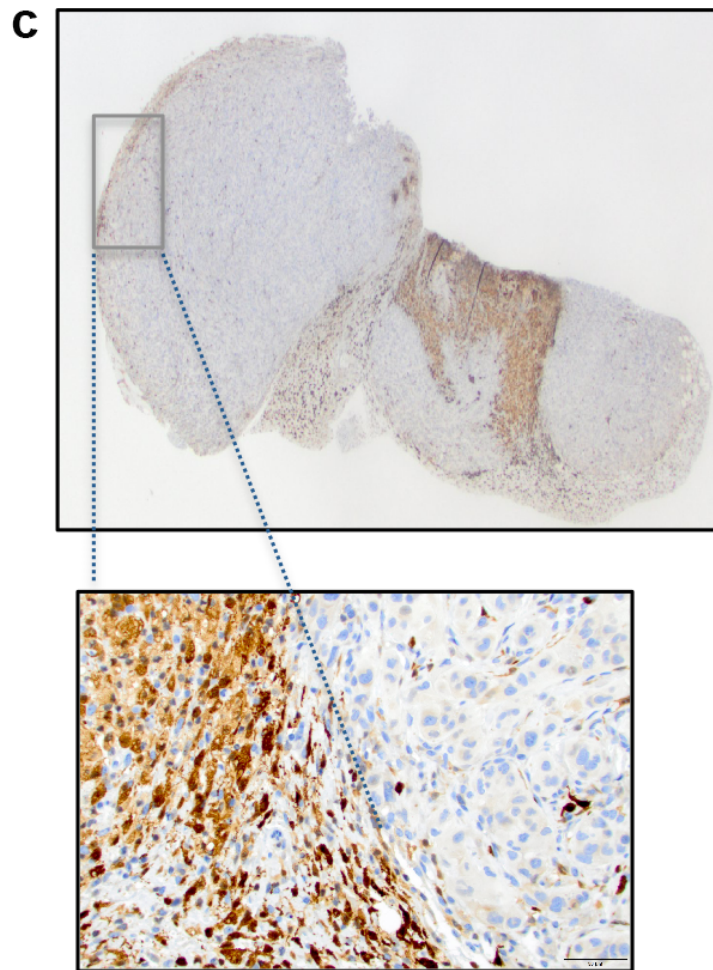



# Supp. Figure 6

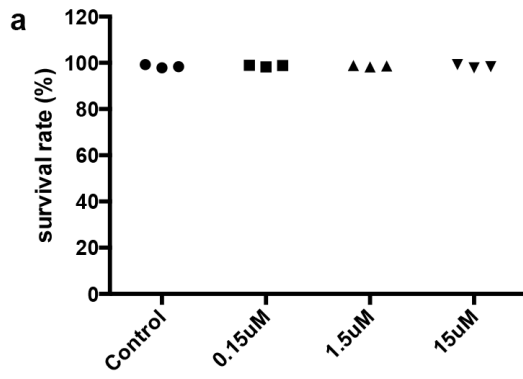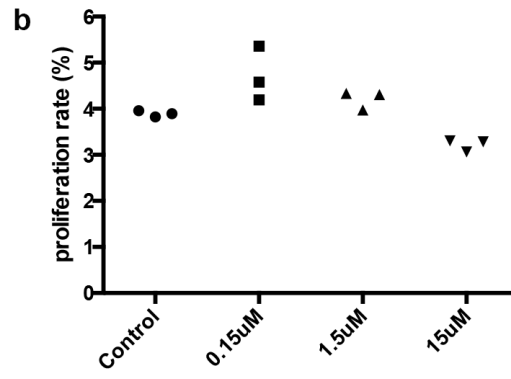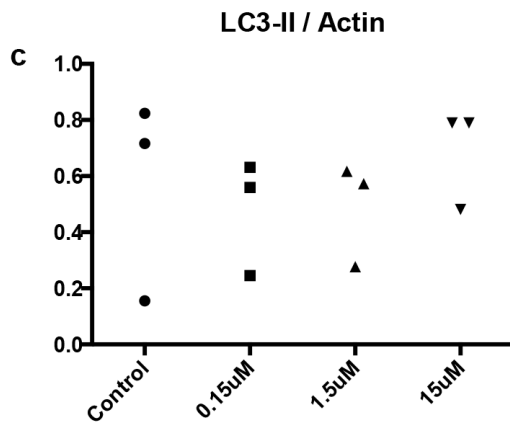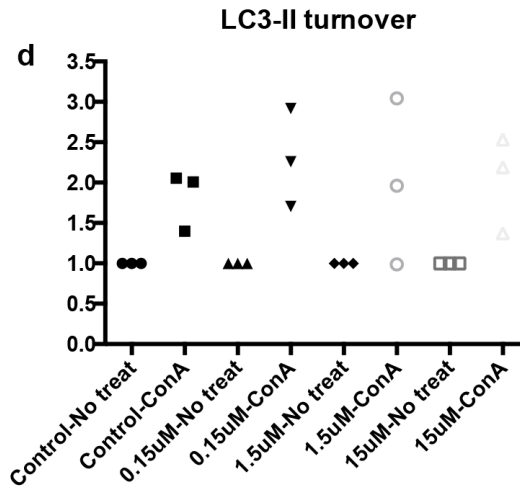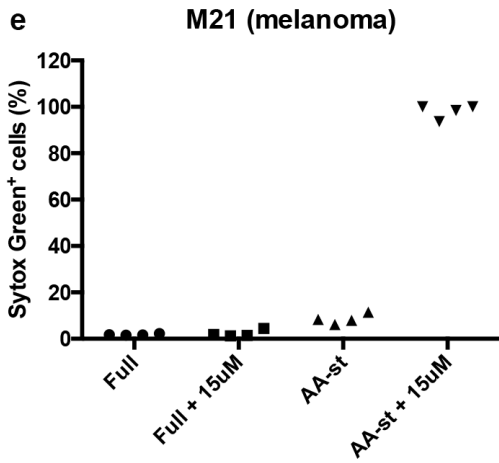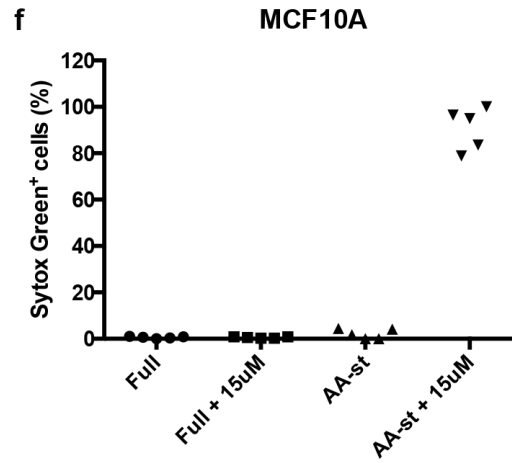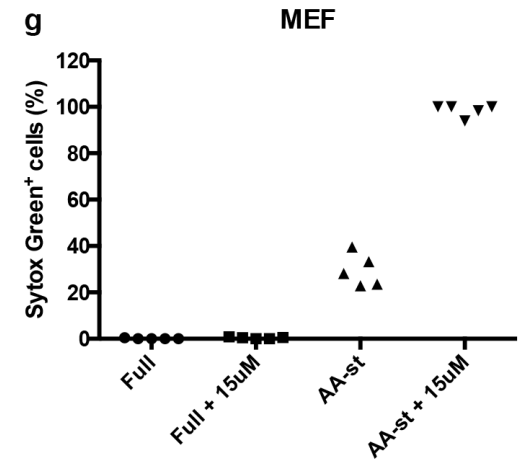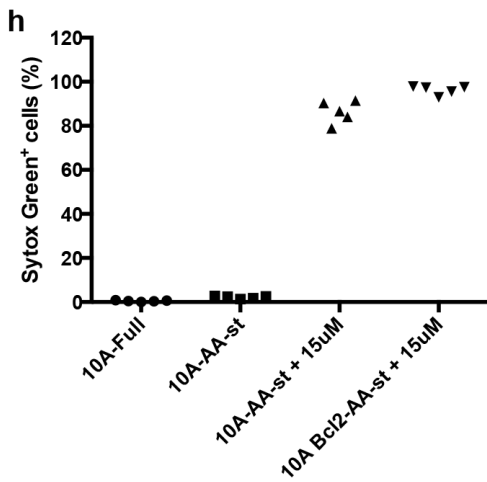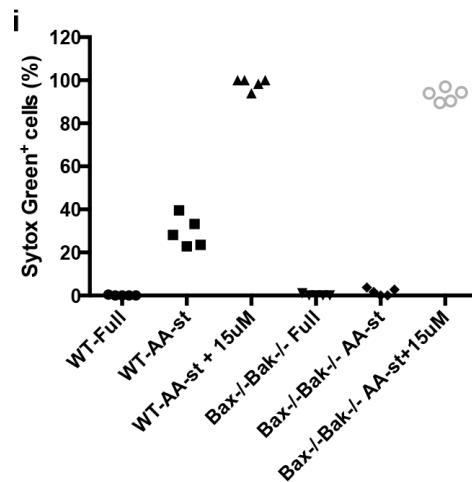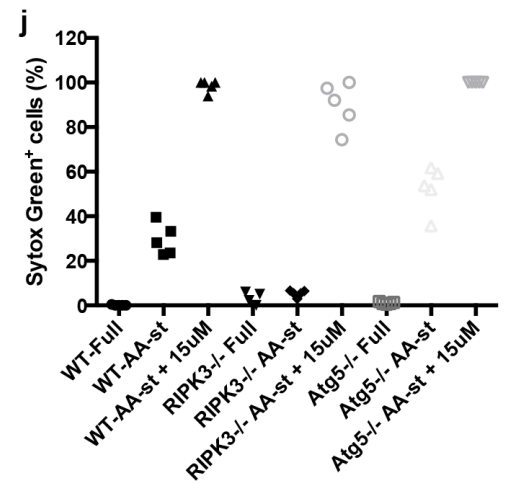

**Supp. Figure 7**

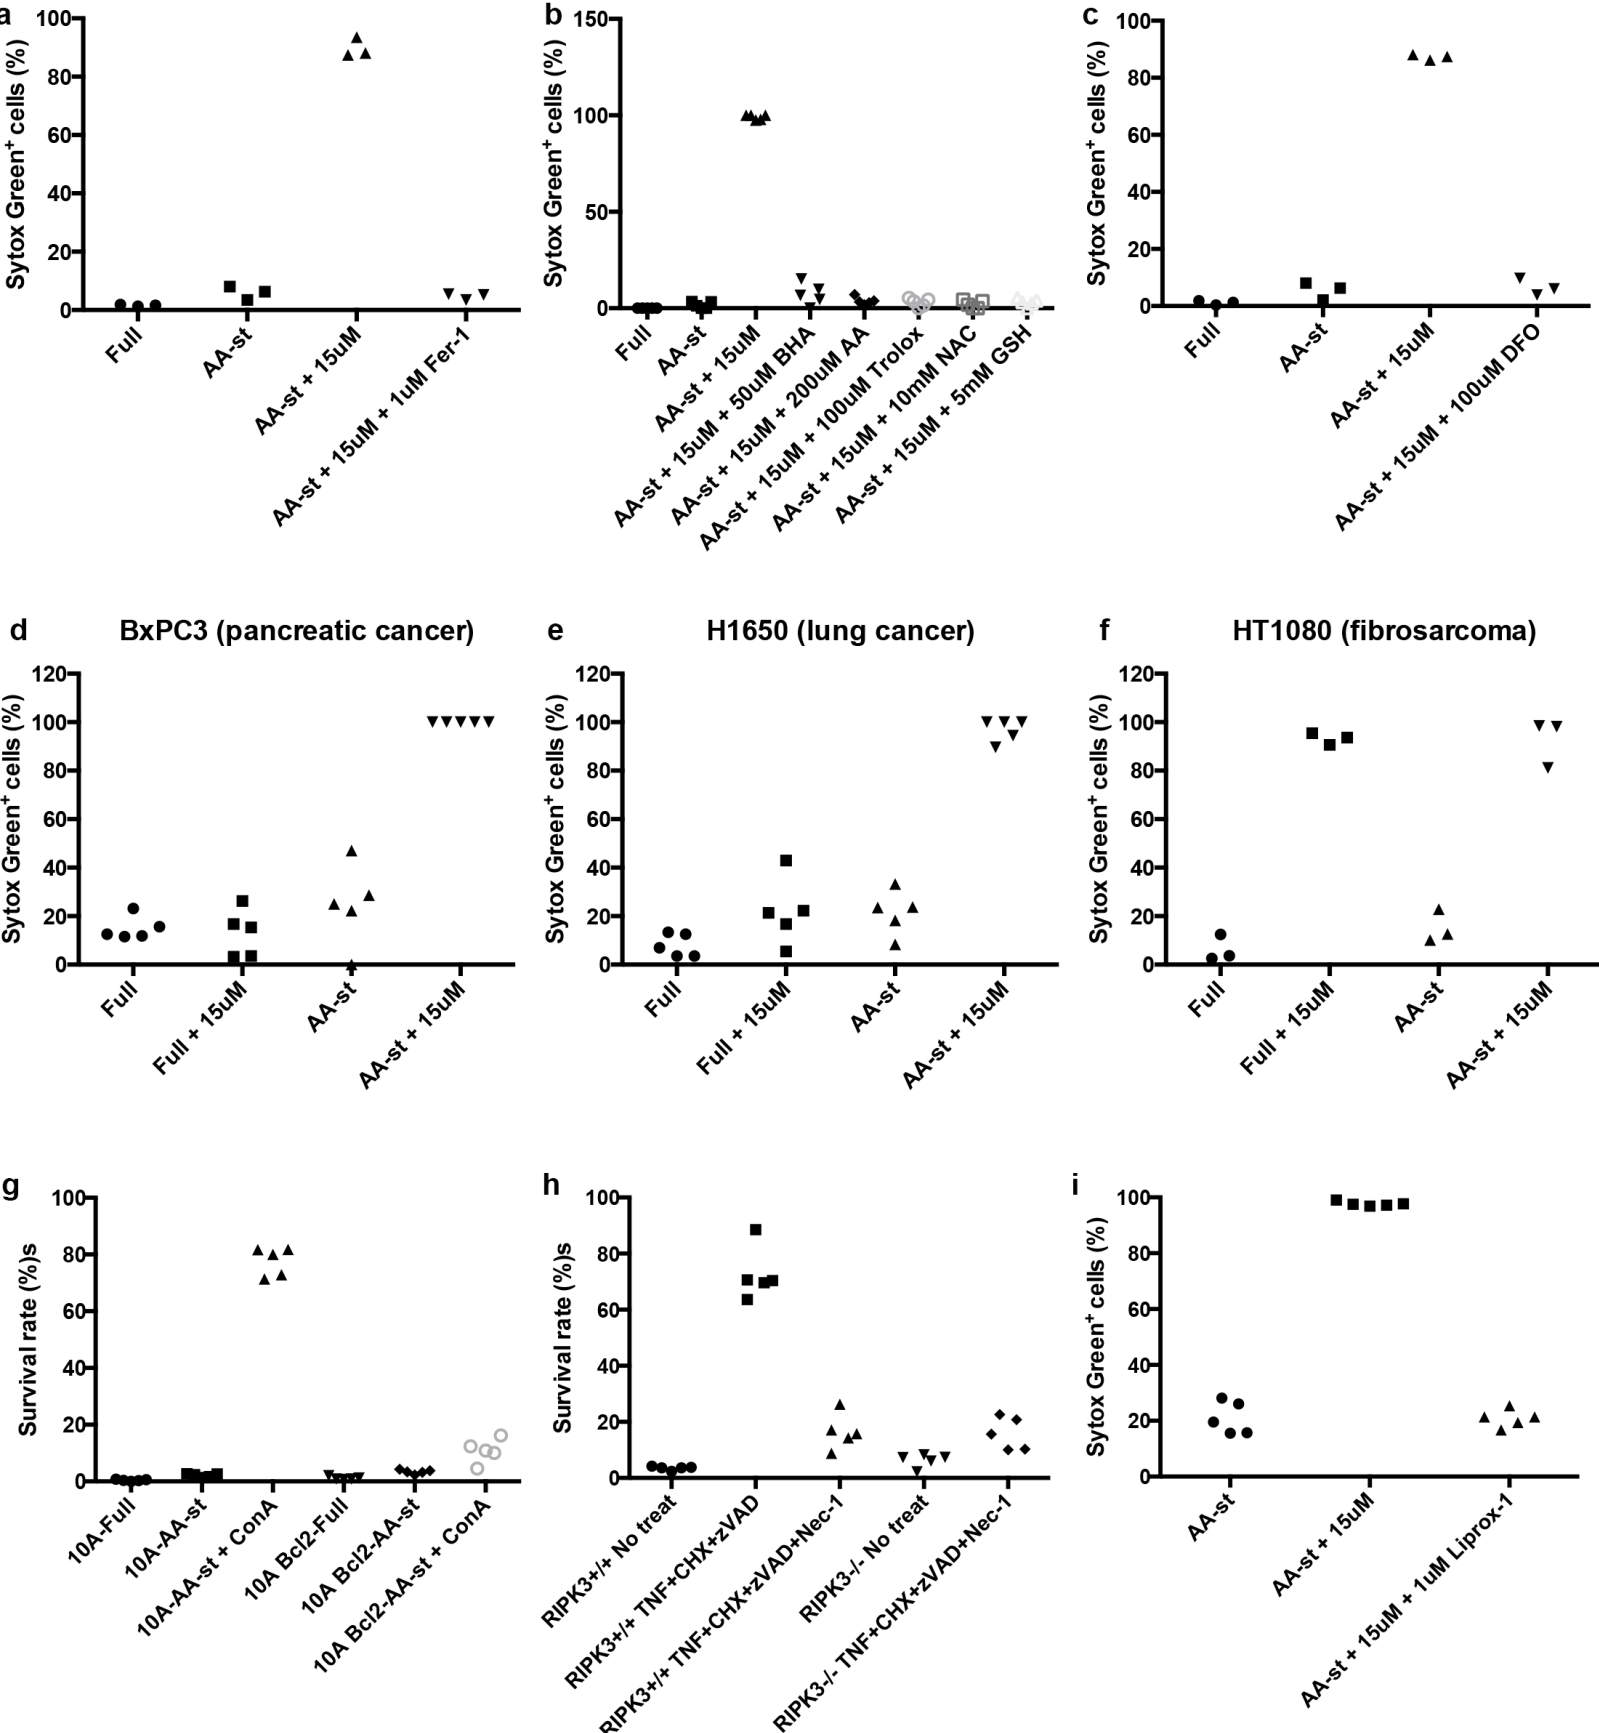





**Table S1. Iron Concentrations Measured by Microwave Plasma Atomic Emission Spectroscopy (MP-AES)**

| Specimen                                   | Iron-Containing Solution Concentrations (before purification) | <sup>†</sup> Measured Iron Concentration (ppb) +/- S.D. (after purification) | Concentration of Iron in C' dots or Cells (μM) | Iron-loading Capacity |
|--------------------------------------------|---------------------------------------------------------------|------------------------------------------------------------------------------|------------------------------------------------|-----------------------|
| C' dots, diluted full media*               | ~6.5 μM                                                       | 33.6 +/- 18.6                                                                | 0.60                                           | 46.2%                 |
| C' dots, diluted AA-free media*            | ~6.5 μM                                                       | 33.9 +/- 16.3                                                                | 0.61                                           | 46.9%                 |
| C' dots, Fe <sup>3+</sup> -doped solution  | 1.5 μM                                                        | 8.32 +/- 12.9                                                                | 0.15                                           | 50.0%                 |
| C' dots, Fe <sup>3+</sup> -doped solution  | 15.0 μM                                                       | 144.7 +/- 16.3                                                               | 2.58                                           | 86.0%                 |
| C' dots, Fe <sup>3+</sup> -doped solution  | 1.5 mM                                                        | 522.6 +/- 32.6                                                               | 9.33                                           | 3.1%                  |
| C' dots only                               | NA                                                            | BDL                                                                          | BDL                                            | NA                    |
|                                            |                                                               |                                                                              |                                                |                       |
| C' dot-exposed HT1080 cells, AA-free media | ~8.6 μM                                                       | 37.6 +/- 7.8                                                                 | 0.67                                           | ~8.0%                 |
| HT1080 cells, AA-free media                | ~8.6 μM                                                       | BDL                                                                          | BDL                                            | NA                    |

BDL, below detection limit; NA not applicable

\*iron present in undiluted full and AA-free media is 8.6 μM

<sup>†</sup>re-suspended in water or phosphate buffer solution

**Table S2.** Metabolic concentration profiles in tumor-bearing mice

|                          |                          | <i>HT1080<br/>Particle-Exposed<br/>Female</i> |      |      | <i>HT1080<br/>Saline Vehicle</i> |      |      |               |      |      | <i>786-O<br/>Particle-Exposed<br/>Female</i> |      |      | <i>786-O<br/>Saline Vehicle<br/>Male</i> |     |      |
|--------------------------|--------------------------|-----------------------------------------------|------|------|----------------------------------|------|------|---------------|------|------|----------------------------------------------|------|------|------------------------------------------|-----|------|
|                          |                          |                                               |      |      | <i>Male</i>                      |      |      | <i>Female</i> |      |      |                                              |      |      |                                          |     |      |
| <b>Metabolic profile</b> | Na (mEq/L)               | 151                                           | 149  | 153  | 156                              | 156  | 152  | 152           | 156  | 152  | 157                                          | 157  | 154  | 155                                      | QNS | QNS  |
|                          | K (mEq/L)                | 8.1                                           | 9.2  | 8.2  | 9.6                              | 9.3  | 10.7 | 9.1           | 8.2  | 8.5  | 8.5                                          | 8.8  | 10.1 | 8.8                                      | QNS | QNS  |
|                          | Cl (mEq/L)               | 111                                           | 111  | 111  | 108                              | 109  | 109  | 117           | 113  | 112  | 114                                          | 115  | 113  | 110                                      | QNS | QNS  |
|                          | TCO <sub>2</sub> (mEq/L) | 26                                            | 24   | 26   | 13                               | 23   | 21   | 18            | 23   | 23   | 14                                           | 11   | 10   | 18                                       | QNS | 15   |
|                          | Ca (mg/dL)               | 10.5                                          | 10.2 | 10.2 | 10.3                             | 10.3 | 9.7  | 10.5          | 10.4 | 10.3 | 9.7                                          | 10.0 | 10.4 | 10.1                                     | 6.4 | 9.2  |
|                          | P (mg/dL)                | 9.2                                           | 9.0  | 8.6  | 9.1                              | 10.0 | 9.1  | 9.5           | 8.6  | 7.6  | 9.4                                          | 9.0  | 10.8 | 9.9                                      | 8.5 | 10.0 |
| <b>Renal</b>             | GLU (mg/dL)              | 179                                           | 184  | 192  | 108                              | 153  | 149  | 216           | 164  | 215  | 142                                          | 208  | 224  | 210                                      | 149 | 160  |
|                          | BUN (mg/dL)              | 12                                            | 18   | 19   | 29                               | 28   | 30   | 19            | 21   | 23   | 16                                           | 17   | 16   | 24                                       | 19  | 21   |
|                          | Crea (mg/dL)             | 0.2                                           | 0.2  | 0.24 | 0.12                             | 0.12 | 0.03 | 0.20          | 0.23 | 0.21 | 0.10                                         | 0.11 | 0.13 | 0.18                                     | QNS | QNS  |
|                          | ALP (U/L)                | 29                                            | 37   | 58   | 67                               | 71   | 45   | 73            | 56   | 48   | 106                                          | 95   | 120  | 71                                       | 60  | 55   |
|                          | AST (U/L)                | 140                                           | 293  | 120  | 113                              | 67   | 119  | 365           | 149  | 209  | 188                                          | 156  | 1100 | 68                                       | 214 | 43   |
|                          | ALT (U/L)                | 15                                            | 94   | 30   | 24                               | 18   | 25   | 158           | 57   | 71   | 87                                           | 66   | 509  | 34                                       | 144 | 21   |
|                          | GGT (U/L)                | 0                                             | 0    | 0    | 0                                | 0    | 0    | 0             | 0    | 0    | 0                                            | 0    | 0    | 0                                        | 0   | 0    |
|                          | TBIL (mg/dL)             | 0.8*                                          | 0.8* | 0.9* | 0.2                              | 0.3  | 0.4  | 0.3           | 0.2  | 0.3  | 0.8*                                         | 0.7* | 0.9* | 0.2                                      | 0.2 | 0.1  |
|                          | DBIL (mg/dL)             | 0.1                                           | 0.1  | 0.1  | 0.0                              | 0.0  | 0.0  | 0.0           | 0.0  | 0.1  | 0.1                                          | 0.1  | 0.1  | 0.1                                      | 0.0 | 0.0  |
|                          | IBIL (mg/dL)             | 0.7*                                          | 0.7* | 0.8* | 0.2                              | 0.3  | 0.4  | 0.3           | 0.2  | 0.2  | 0.7*                                         | 0.6* | 0.8* | 0.1                                      | 0.2 | 0.1  |
|                          | TP (g/L)                 | 4.9                                           | 4.9  | 5.1  | 5.3                              | 5.2  | 5.3  | 5.3           | 5.3  | 5.3  | 4.9                                          | 5.1  | 5.4  | 5.0                                      | 5.6 | 5.3  |
|                          | ALB (g/L)                | 3.8                                           | 3.9  | 3.9  | 3.3                              | 3.1  | 3.1  | 3.3           | 3.2  | 3.2  | 3.1                                          | 3.2  | 3.3  | 2.9                                      | 3.3 | 3.0  |
|                          | GLOB (g/dL)              | 1.9                                           | 2.0  | 2.0  | 2.0                              | 2.1  | 2.2  | 2.0           | 2.1  | 2.1  | 1.8                                          | 1.9  | 2.1  | 2.1                                      | 2.3 | 2.3  |
| CHOL (mg/dL)             | 86                       | 83                                            | 88   | 82   | 98                               | 104  | 99   | 108           | 118  | 72   | 71                                           | 88   | 99   | 67                                       | 90  |      |
| TRIG (mg/dL)             | 94                       | 74                                            | 96   | 89   | 159                              | 127  | 84   | 88            | 85   | 95   | 94                                           | 94   | 89   | 151                                      | 92  |      |
| CK (U/L)                 | 442                      | 506                                           | 325  | 50   | 122                              | 255  | 616  | 300           | 358  | 63   | 117                                          | 458  | 100  | 53                                       | 36  |      |

Na, sodium; K, potassium; Cl, chloride; TCO<sub>2</sub>, total carbon dioxide; Ca, calcium; P, phosphorus; GLU, glucose; BUN, blood urea nitrogen; Crea, creatinine; ALP, alkaline phosphatase; AST, aspartate aminotransferase; ALT, alanine aminotransferase; GGT, gamma-glutamyl transferase; TBIL, total bilirubin; DBIL, direct bilirubin; IBIL, indirect bilirubin; TP, total protein; ALB, albumin; GLOB, globulin; CHOL, cholesterol; TRIG, triglyceride; CK, creatine kinase; \*, elevated relative to normal values

**Table S3. Hematologic profiles in tumor-bearing mice**

|                   |              | 786-O<br>Particle-Exposed<br>Female |       |       | 786-O<br>Saline Vehicle<br>Male |       |       |
|-------------------|--------------|-------------------------------------|-------|-------|---------------------------------|-------|-------|
| <b>Hematology</b> | RBC (M/uL)   | 9.87                                | 9.79  | 10.50 | 9.53                            | 9.30  | 9.13  |
|                   | HGB (g/dL)   | 15.3                                | 15.0  | 16.5  | 14.4                            | 14.2  | 14.0  |
|                   | HCT (%)      | 52.1                                | 52.0  | 57.4  | 49.8                            | 48.7  | 48.2  |
|                   | MCV (fL)     | 52.8                                | 53.1  | 54.7  | 52.3                            | 52.4  | 52.8  |
|                   | MCH (pg)     | 15.5                                | 15.3  | 15.7  | 15.1                            | 15.3  | 15.3  |
|                   | MCHC (g/dL)  | 29.4                                | 28.8  | 28.7  | 28.9                            | 29.2  | 29.0  |
|                   | RDW-SD (fL)  | 31.4                                | 32.3  | 31.0  | 29.9                            | 29.3  | 30.7  |
|                   | RDW-CV (%)   | 23.5                                | 23.5  | 23.0  | 22.5                            | 22.2  | 22.3  |
|                   | RET (K/uL)   | 436.3                               | 470.9 | 573.3 | 487.9                           | 444.5 | 454.7 |
|                   | RET (%)      | 4.42                                | 4.81  | 5.46  | 5.12                            | 4.78  | 4.98  |
|                   | PLT (K/uL)   | 908                                 | 650   | 682   | 365                             | 294   | 985   |
|                   | PDW (fL)     | 7.0                                 | 7.0   | 7.1   | 7.8                             | 8.2   | 6.6   |
|                   | MPV (fL)     | 6.2                                 | 6.1   | 6.5   | 6.7                             | 6.9   | 6.1   |
|                   | WBC (K/uL)   | 2.25                                | 1.93  | 2.21  | 3.22                            | 2.73  | 3.75  |
|                   | NEUT (K/uL)  | 0.86                                | 0.82  | 0.70  | 1.65                            | 1.32  | 2.36  |
|                   | LYMPH (K/uL) | 0.84                                | 0.84  | 0.80  | 1.06                            | 1.01  | 0.93  |
|                   | MONO (K/uL)  | 0.46                                | 0.14  | 0.58  | 0.34                            | 0.28  | 0.35  |
|                   | EO (K/uL)    | 0.09                                | 0.13  | 0.12  | 0.16                            | 0.10  | 0.10  |
|                   | BASO (K/uL)  | 0.00                                | 0.00  | 0.01  | 0.01                            | 0.02  | 0.01  |
|                   | NEUT (%)     | 38.3                                | 42.5  | 31.7  | 51.2                            | 48.3  | 62.9  |
|                   | LYMPH (%)    | 37.3                                | 43.5  | 36.2  | 32.9                            | 37.0  | 24.8  |
|                   | MONO (%)     | 20.4                                | 7.3   | 26.2  | 10.6                            | 10.3  | 9.3   |
| EO (%)            | 4.0          | 6.7                                 | 5.4   | 5.0   | 3.7                             | 2.7   |       |
| BASO (%)          | 0.0          | 0.0                                 | 0.5   | 0.3   | 0.7                             | 0.3   |       |

RBC, red blood cell; HGB, hemoglobin concentration; HCT, hematocrit; MCV, mean corpuscular volume; MCH, mean corpuscular hemoglobin; MCHC, mean corpuscular hemoglobin concentration; RDW-SD and RDW-CV, red blood cell distribution width standard deviation and coefficient of variance; RET, reticulocyte relative and absolute counts; PLT, platelet count; PDW, platelet distribution width; MPV, mean platelet volume; WBC, white blood cell; and relative and absolute counts of NEUT, neutrophils, LYMPH, lymphocytes, MONO, monocytes, EO, eosinophils, BASO, basophils

**Table S4.** Histopathologic profiles in tumor-bearing mice

|                       | <b><i>HT1080<br/>Particle-Exposed<br/>Female</i></b> |                                                                                   | <b><i>HT1080<br/>Saline Vehicle<br/>Female</i></b> |                                 | <b><i>786-O<br/>Particle-Exposed<br/>Female</i></b> |                                | <b><i>786-O<br/>Saline Vehicle<br/>Male</i></b>       |                                |
|-----------------------|------------------------------------------------------|-----------------------------------------------------------------------------------|----------------------------------------------------|---------------------------------|-----------------------------------------------------|--------------------------------|-------------------------------------------------------|--------------------------------|
| <b>Tumor H&amp;E</b>  | SQ tumor consistent with HT1080                      | SQ tumor consistent with HT1080                                                   | SQ tumor consistent with HT1080                    | SQ tumor consistent with HT1080 | SQ tumor consistent with 786-O                      | SQ tumor consistent with 786-O | SQ tumor consistent with 786-O                        | SQ tumor consistent with 786-O |
| <b>Tumor Mac2</b>     | Marked                                               | Marked                                                                            | Mild                                               | Mild                            | Marked                                              | Marked                         | ND                                                    | ND                             |
| <b>Liver H&amp;E</b>  | N.                                                   | Hepatitis, histiocytic and neutrophilic, 1, MFR; Extramedullary hematopoiesis, 1. | N.                                                 | N.                              | N.                                                  | N.                             | N.                                                    | N.                             |
| <b>Kidney H&amp;E</b> | Cortical tubular cyst, F, U.                         | N.                                                                                | N.                                                 | N.                              | N.                                                  | N.                             | Cortical tubular necrosis and regeneration, 1, MF, U. | N.                             |

SQ, subcutaneous; N, normal; Mac2, macrophage immunohistochemical marker; N: Normal, F: Focal, FE: Focally extensive, MF: Multifocal, MFR: Multifocal random, D: Diffuse, U: Unilateral, 1: Minimal, 2: Mild, 3: Moderate, 4: Marked.
